# Supplementary material for: Household smoking impact on the oral health of 5- to 7-years-old children
Source: Springer Nature journal article supplement (doi:10.1186/s12903-023-03715-3), 2023-12-19
Supplement: MOESM1 [file 26547028]

|                                                                                                                                                                                                                                                                                                                                                                                                                                                                                                                                                                                                                                          |                                                                                                                                                                                                                                                                                  |                                                                                                                  |                                                                                                                                                                             |          |  |
|------------------------------------------------------------------------------------------------------------------------------------------------------------------------------------------------------------------------------------------------------------------------------------------------------------------------------------------------------------------------------------------------------------------------------------------------------------------------------------------------------------------------------------------------------------------------------------------------------------------------------------------|----------------------------------------------------------------------------------------------------------------------------------------------------------------------------------------------------------------------------------------------------------------------------------|------------------------------------------------------------------------------------------------------------------|-----------------------------------------------------------------------------------------------------------------------------------------------------------------------------|----------|--|
| Code                                                                                                                                                                                                                                                                                                                                                                                                                                                                                                                                                                                                                                     |                                                                                                                                                                                                                                                                                  | 1.Date of Birth                                                                                                  |                                                                                                                                                                             | 2.Gender |  |
| 3.Child school grading                                                                                                                                                                                                                                                                                                                                                                                                                                                                                                                                                                                                                   | <input type="checkbox"/> Non educated <input type="checkbox"/> 1 <sup>st</sup> grade <input type="checkbox"/> 2 <sup>nd</sup> grade <input type="checkbox"/> 3 <sup>rd</sup> grade <input type="checkbox"/> 4 <sup>th</sup> grade <input type="checkbox"/> 5 <sup>th</sup> grade |                                                                                                                  |                                                                                                                                                                             |          |  |
| 4.Phone number                                                                                                                                                                                                                                                                                                                                                                                                                                                                                                                                                                                                                           |                                                                                                                                                                                                                                                                                  |                                                                                                                  | 5.Residence                                                                                                                                                                 |          |  |
| 6.Mother occupation                                                                                                                                                                                                                                                                                                                                                                                                                                                                                                                                                                                                                      |                                                                                                                                                                                                                                                                                  | 7.Mother education level                                                                                         | <input type="checkbox"/> Illiterate<br><input type="checkbox"/> High school<br><input type="checkbox"/> Bachelor                                                            |          |  |
| 8.Father occupation                                                                                                                                                                                                                                                                                                                                                                                                                                                                                                                                                                                                                      |                                                                                                                                                                                                                                                                                  | 9.Father education level                                                                                         | <input type="checkbox"/> Illiterate<br><input type="checkbox"/> High school<br><input type="checkbox"/> Bachelor                                                            |          |  |
| 10.Number of children in house                                                                                                                                                                                                                                                                                                                                                                                                                                                                                                                                                                                                           |                                                                                                                                                                                                                                                                                  | 11.Kitchen type                                                                                                  | <input type="checkbox"/> Closed kitchen <input type="checkbox"/> Open kitchen                                                                                               |          |  |
| 12.NUMBER OF ROOMS IN HOUSE                                                                                                                                                                                                                                                                                                                                                                                                                                                                                                                                                                                                              |                                                                                                                                                                                                                                                                                  |                                                                                                                  |                                                                                                                                                                             |          |  |
| 13.VENTILATION IN HOUSE                                                                                                                                                                                                                                                                                                                                                                                                                                                                                                                                                                                                                  |                                                                                                                                                                                                                                                                                  | <input type="checkbox"/> AIR CONDITION <input type="checkbox"/> FAN <input type="checkbox"/> NATURAL VENTILATION |                                                                                                                                                                             |          |  |
| 14.CHILD COMPLAIN                                                                                                                                                                                                                                                                                                                                                                                                                                                                                                                                                                                                                        |                                                                                                                                                                                                                                                                                  |                                                                                                                  |                                                                                                                                                                             |          |  |
| Health problems suffered by child<br><input type="checkbox"/> Sneezing<br><input type="checkbox"/> Coughing<br><input type="checkbox"/> Asthmatic attacks<br><input type="checkbox"/> Recurrent respiratory infections      NO of respiratory tract infections /year.....<br><input type="checkbox"/> Otitis media<br><input type="checkbox"/> Cardiovasular problems.....<br><input type="checkbox"/> Gastrointestinal problems.....<br><input type="checkbox"/> Gentiurinary disorders.....<br><input type="checkbox"/> Neuropshycatric disordes.....<br><input type="checkbox"/> Others .....<br>If any state disorder beside it----- |                                                                                                                                                                                                                                                                                  |                                                                                                                  |                                                                                                                                                                             |          |  |
| 15.Father smokes                                                                                                                                                                                                                                                                                                                                                                                                                                                                                                                                                                                                                         | <input type="checkbox"/> Yes<br><input type="checkbox"/> No                                                                                                                                                                                                                      | <input type="checkbox"/> Cigg smoker<br><input type="checkbox"/> Hubble bubble smoker                            | 17.No of cigg /day <input type="checkbox"/> <10cig/d<br><input type="checkbox"/> 10-20cig/d<br><input type="checkbox"/> >20cig/d<br>If hubble bubble, No of stones/day..... |          |  |
| 18.FATHER SMOKES SINCE                                                                                                                                                                                                                                                                                                                                                                                                                                                                                                                                                                                                                   |                                                                                                                                                                                                                                                                                  |                                                                                                                  |                                                                                                                                                                             |          |  |
| 19.Mother smokes                                                                                                                                                                                                                                                                                                                                                                                                                                                                                                                                                                                                                         | <input type="checkbox"/> Yes<br><input type="checkbox"/> no                                                                                                                                                                                                                      | <input type="checkbox"/> Cigg smoker<br><input type="checkbox"/> Hubble bubble smoker                            | 21.No of cigg /day <input type="checkbox"/> <10cig/d<br><input type="checkbox"/> 10-20cig/d<br><input type="checkbox"/> >20cig/d<br>If hubble bubble, No of stones/day..... |          |  |
| 22.MOTHER SMOKES SINCE                                                                                                                                                                                                                                                                                                                                                                                                                                                                                                                                                                                                                   |                                                                                                                                                                                                                                                                                  |                                                                                                                  |                                                                                                                                                                             |          |  |
| 23.Smoking outside the house                                                                                                                                                                                                                                                                                                                                                                                                                                                                                                                                                                                                             |                                                                                                                                                                                                                                                                                  | <input type="checkbox"/> YES <input type="checkbox"/> NO                                                         |                                                                                                                                                                             |          |  |
| 24.Smoking inside the house                                                                                                                                                                                                                                                                                                                                                                                                                                                                                                                                                                                                              |                                                                                                                                                                                                                                                                                  | <input type="checkbox"/> YES <input type="checkbox"/> NO                                                         |                                                                                                                                                                             |          |  |
| 25.Smoking anywhere in the house                                                                                                                                                                                                                                                                                                                                                                                                                                                                                                                                                                                                         |                                                                                                                                                                                                                                                                                  | <input type="checkbox"/> YES <input type="checkbox"/> NO                                                         |                                                                                                                                                                             |          |  |
| 26.Smoking in a specified room                                                                                                                                                                                                                                                                                                                                                                                                                                                                                                                                                                                                           |                                                                                                                                                                                                                                                                                  | <input type="checkbox"/> YES <input type="checkbox"/> NO                                                         |                                                                                                                                                                             |          |  |
